# Supplementary material
Source: PubMed Central journal article supplement (PMC5240742)
Supplement: supp_tpc.16.00684_TPC2016-00684-RAR1_Supplemental_Data.pdf [file supp_tpc.16.00684_TPC2016-00684-RAR1_Supplemental_Data.pdf]

## Supplemental Data Figure 1

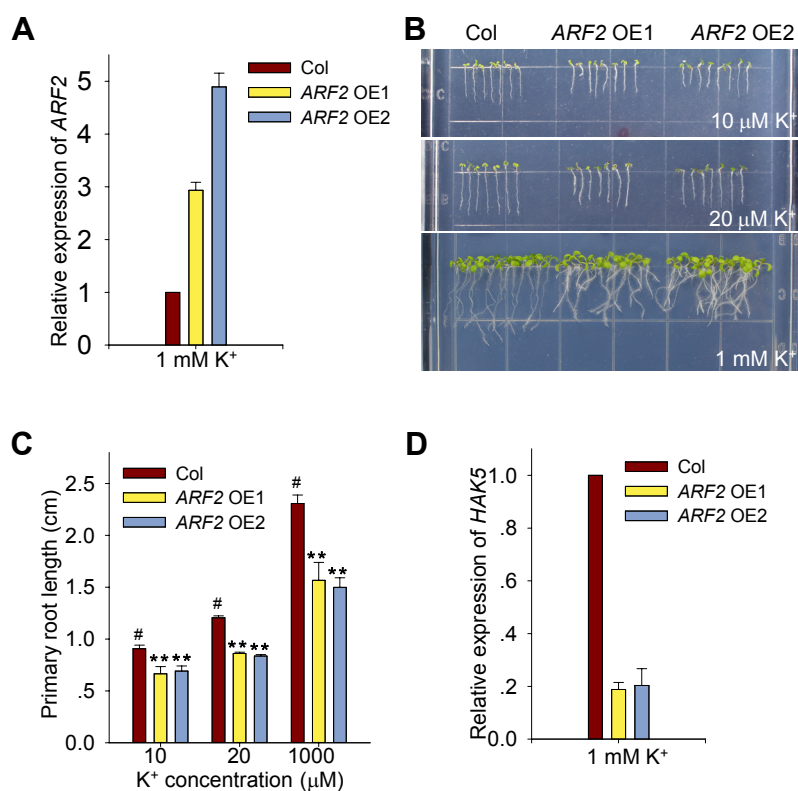

### Figure S1. Phenotype Analysis of *ARF2*-overexpressing Lines

**(A)** RT-qPCR analysis of *ARF2* expression in *ARF2*-overexpressing lines (OE1 and OE2) driven by the 35S promoter. Seedlings were germinated and grown on K<sup>+</sup> sufficient medium for 7 days. Data are means  $\pm$  SE (n=3).

**(B)** Phenotype comparison between wild-type and *ARF2*-overexpressing lines. Seedlings were germinated and grown on low-K<sup>+</sup> medium or K<sup>+</sup> sufficient medium for 7 days.

**(C)** Primary root length of various plants tested in **(B)**. Data are means  $\pm$  SE (n=15). Student's *t*-test (\*\*P<0.01) was used to analyze statistical significance, and “#” represents control.

**(D)** The qPCR analyses of *HAK5* expression in *ARF2*-overexpressing lines. Seedlings were germinated and grown on K<sup>+</sup> sufficient medium for 7 days. Data are means  $\pm$  SE (n=3).

## Supplemental Data Figure 2

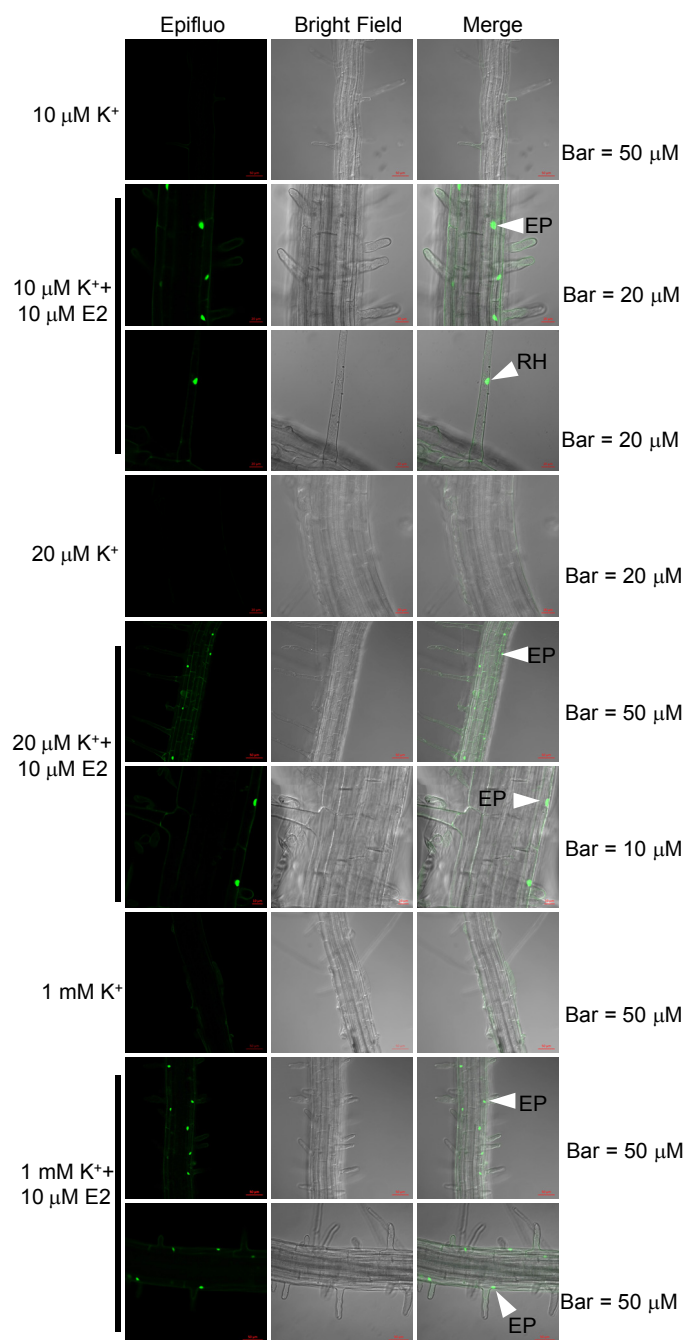

**Figure S2. ARF2 Proteins Are Targeted to the Nucleus in the Root Epidermis and Root Hairs**

The inducible *ARF2*-overexpressing lines (OE3 and OE4) were germinated and grown on low- $K^+$  medium or  $K^+$  sufficient medium with or without 10  $\mu$ M  $\beta$ -estradiol (E2) for 7 days. ARF2-GFP proteins were induced and expressed after application of  $\beta$ -estradiol (E2). ARF2-GFP proteins are mainly targeted to the nucleus in the root epidermis (EP) and root hairs (RH).

## Supplemental Data Figure 3

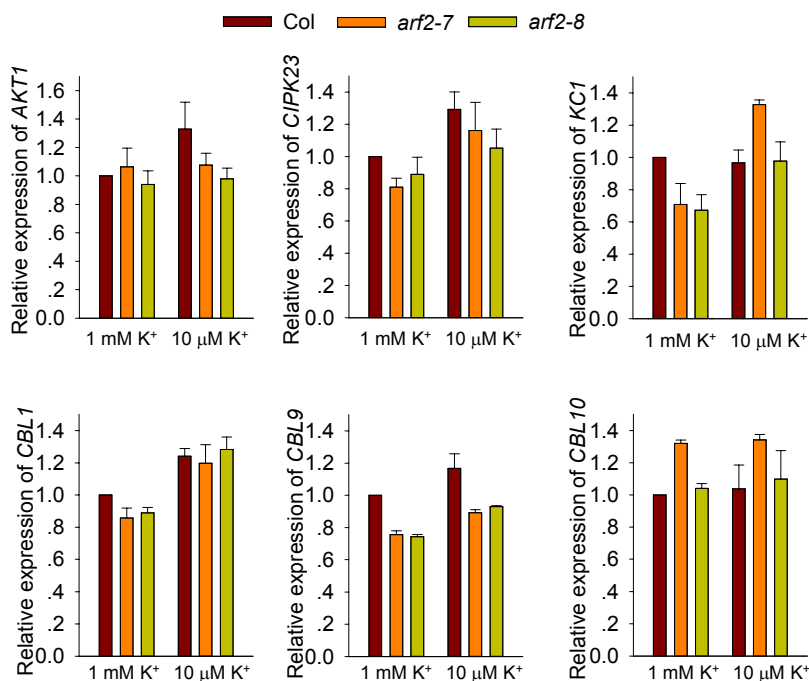

### Figure S3. Expression Analyses of Potassium Relevant Genes in *arf2* Mutants

Seedlings were germinated and grown on K<sup>+</sup> sufficient medium for 5 days, and then transferred to low-K<sup>+</sup> medium or K<sup>+</sup> sufficient medium for 12 h. Total RNA of plants was extracted and used for RT-qPCR analyses. The expression levels of *AKT1*, *CIPK23*, *KC1*, *CBL1*, *CBL9* and *CBL10* were determined in wild-type and *arf2* mutants. Data are means  $\pm$  SE (n=3). Student's *t*-test (\*\*P<0.01) was used to analyze statistical significance, and “#” represents control.

## Supplemental Data Figure 4

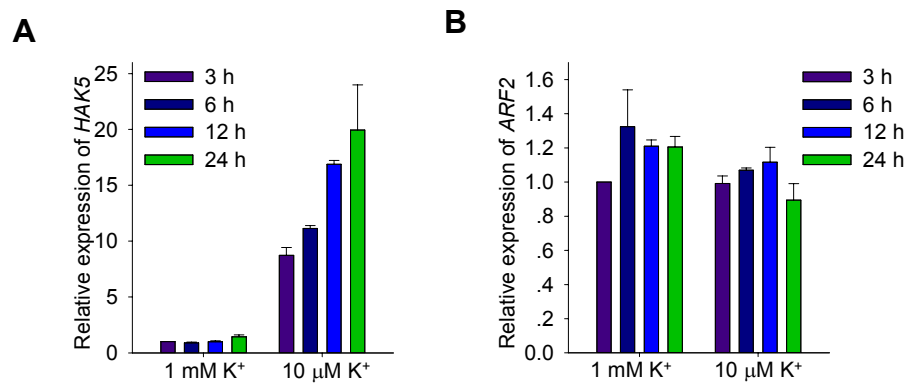

**Figure S4. Expression Analyses of *HAK5* and *ARF2* in Response to Low-K<sup>+</sup> Stress**

Wild-type plants were germinated and grown on K<sup>+</sup> sufficient medium for 5 days, and then transferred to low-K<sup>+</sup> medium or K<sup>+</sup> sufficient medium for the indicated times. Total RNA of plants was extracted and used for RT-qPCR analyses. The expression levels of *HAK5* and *ARF2* were determined. Data are means  $\pm$  SE (n=3).

## Supplemental Data Figure 5

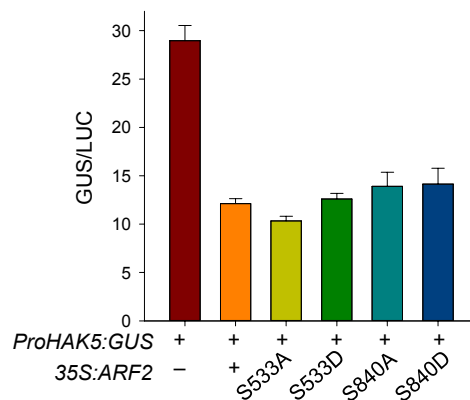

**Figure S5. GUS/LUC Assay in Tobacco Leaves to Test the Activity of Mutant ARF2 Proteins**

S533 and S840 on ARF2 were mutated to Ala (A) or Asp (D). The mutated 35S:ARF2 were co-expressed with *ProHAK5:GUS* in tobacco leaves. Then the GUS activity was measured. *LUC* gene was taken as an internal control. Data are means  $\pm$  SE (n=6).

## Supplemental Data Figure 6

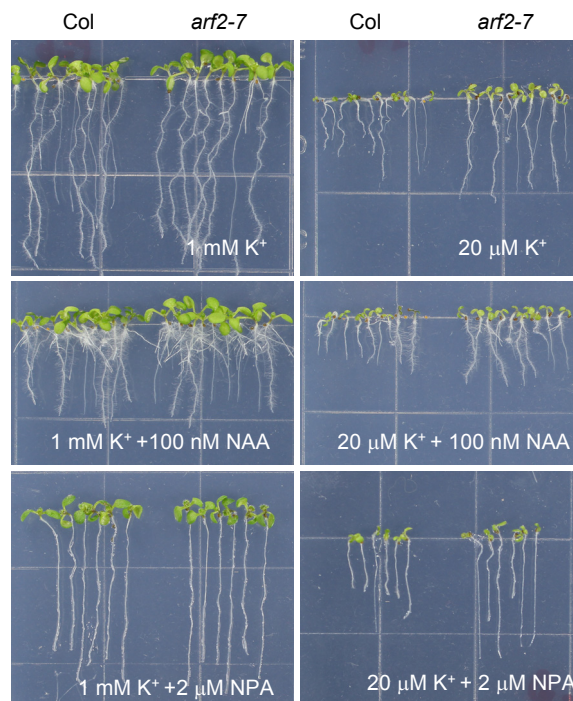

### Figure S6. Phenotype Test of *arf2* Mutant in Response to NAA or NPA

Wild-type and *arf2-7* mutant were germinated and grown on low-K<sup>+</sup> medium or K<sup>+</sup> sufficient medium for 8 days. NAA (100 nM) and NPA (2 μM) were added in the medium respectively.

## Supplemental Table 1

Primer sequences and enzyme sites used in this study.

| Primer name                                    | Vector                            | Primer sequence (5'–3')                                 |
|------------------------------------------------|-----------------------------------|---------------------------------------------------------|
| <b>Primers used in transgenic construction</b> |                                   |                                                         |
| ARF2-1305-BamHI-F                              | pCAMBIA1305                       | CGGGATCCAAAGAAAGAGAGATGAA<br>GGTGAGATGAATGAAAGAGTCG     |
| ARF2-1305-Sall-R                               |                                   | ACGCGTCGACAGAGTTCCCAGCGCT<br>GGACAATG                   |
| ARF2-SpeI-F                                    | SUPERR:sXVE:GFP <sub>c</sub> :Bar | GGACTAGTATGGCGAGTTCGGAGGT<br>TTC                        |
| ARF2-XhoI-R                                    |                                   | CCGCTCGAGAGAGTTCCCAGCGCTG<br>GAC                        |
| ARF2-F                                         | pCXSN                             | ATGGCGAGTTCGGAGGTTTCAATGA                               |
| ARF2-R                                         |                                   | TTAAGAGTTCCCAGCGCTGGACAA                                |
| ProHAK5-1391-SmaI-F                            | pCAMBIA1391                       | ATCGATCCCGGGTTTTTGTGTGTTT<br>TTTTTTTTTTTTTTTTGTGTTGTG   |
| ProHAK5-1391-PstI-R                            |                                   | ATCGATCTGCAGTAGGCTAATGTAAT<br>GGCTTCGTGTGAAAAATCATATGCT |
| HAK5-1391-SmaI-F                               | pCAMBIA1391                       | ATCGATCCCGGGATGGATGGTGAGG<br>AACATCAAATAG               |
| HAK5-1391-SpeI-R                               |                                   | ATCGATACTAGTTAACTCATAGGTCA<br>TGCCAACCTTG               |
| <b>Primers for RT-PCR</b>                      |                                   |                                                         |
| ARF2-F                                         |                                   | ATGGCGAGTTCGGAGGTTTCAATGA                               |
| ARF2-R                                         |                                   | TTAAGAGTTCCCAGCGCTGGACAA                                |
| HAK5-RT-F                                      |                                   | CGGGATCCCGATGGATGGTGAGGAA<br>CATCAAATAG                 |
| HAK5-RT-R                                      |                                   | CGAGCTTTATAACTCATAGGTCATG<br>CCAACCTT                   |
| EF1 $\alpha$ -F                                |                                   | ATGCCCCAGGACATCGTGATTTTCAT                              |
| EF1 $\alpha$ -R                                |                                   | TTGGCGGCACCCTTACGTGGATCA                                |
| <b>Primers for qPCR</b>                        |                                   |                                                         |
| HAK5-qRT-F                                     |                                   | AAGAGGAACCAAATGCTGAGACA                                 |
| HAK5-qRT-R                                     |                                   | GCCCCGATGAAGGGACAT                                      |
| ARF2-qRT-F                                     |                                   | CCTCATCCGAAGGATGCTCAAACG                                |
| ARF2-qRT-R                                     |                                   | GGAGCCATCAACTCTCCATTGAACTC                              |
| Actin2/8-qRT-F                                 |                                   | ACGGTAACATTGTGCTCAGTGGTG                                |
| Actin2/8-qRT-R                                 |                                   | CTTGGAGATCCACATCTGCTGGA                                 |

| Primer name                      | Vector      | Primer sequence (5'–3')                                 |
|----------------------------------|-------------|---------------------------------------------------------|
| <b>Primers for qPCR</b>          |             |                                                         |
| CBL1-qRT-F                       |             | AATGTTGATCGCGCTTCTCT                                    |
| CBL1-qRT-R                       |             | CATGTGGCAATCTCATCGAC                                    |
| CBL9-qRT-F                       |             | AGCACCTATGGGGTTTGATG                                    |
| CBL9-qRT-R                       |             | CTCTTCGTCGATGGTTTTCC                                    |
| CBL10-qRT-F                      |             | TCTGCGCCGTCTTTATACCT                                    |
| CBL10-qRT-R                      |             | AACAGCGCCAGTCTAAGCTC                                    |
| KC1-qRT-F                        |             | ATTGCTTCCAAGGGTGTGAG                                    |
| KC1-qRT-R                        |             | GCGTCGACGTCATTATCAGA                                    |
| AKT1-qRT-F                       |             | TGACGAATGTTCTGCTGGAG                                    |
| AKT1-qRT-R                       |             | TGCCATTGTTATCCGATTCA                                    |
| CIPK23-qRT-F                     |             | CAAGTTCGAGAGGATGGGTTAC                                  |
| CIPK23-qRT-R                     |             | TCTTAGCACTTGCAGAGAACCA                                  |
| <b>Primers for GUS/LUC assay</b> |             |                                                         |
| ProHAK5-1381-HindIII-F           | pCAMBIA1381 | ATCGATAAGCTTTTTTTGCTGTGTTTTTT<br>TTTTTTTTTTTTTTGTGTTGTG |
| ProHAK5-1381-Sall-R              |             | ATCGATGTCGACTAGGCTAATGTAATGG<br>CTTCGTGTGAAAAATCATATGCT |
| ARF2-F                           | pCXSN       | ATGGCGAGTTCGGAGGTTTCAATGA                               |
| ARF2-R                           |             | TTAAGAGTTCCCAGCGCTGGACAA                                |
| 840-SA-F                         | pCXSN       | AGTTGTTGGGAAGGAGCAGATGCAAA<br>GGACGC                    |
| 840-SA-R                         |             | GCGTCCTTTGCATCTGCTCCTTCCCCAA<br>CAACT                   |
| 840-SD-F                         | pCXSN       | GACTTGGCGTCCTTTGCATCGTCTCCTT<br>CCCCAACAACTGCTT         |
| 840-SD-R                         |             | AAGCAGTTGTTGGGAAGGAGACGATG<br>CAAAGGACGCCAAGTC          |
| 689-SA-F                         | pCXSN       | GTCCTGAACCTTTGGTGCTGCTATCTGT<br>GTAAGCC                 |
| 689-SA-R                         |             | GGCTTACACAGATAGCAGCACCAAAGG<br>TTCAGGAC                 |
| 689-SD-F                         | pCXSN       | AGGTCCTGAACCTTTGGGTCTGCTATCT<br>GTGTAAGCCCCGC           |
| 689-SD-R                         |             | GCGGGGCTTACACAGATAGCAGACCCA<br>AAGGTTTCAGGACCT          |



| Primer name                      | Vector   | Primer sequence (5'–3')                                             |
|----------------------------------|----------|---------------------------------------------------------------------|
| <b>Primers for GUS/LUC assay</b> |          |                                                                     |
| 533-SA-F                         | pCXS     | AGGCATAGAAGGTGATGATGCATGGTC<br>ATAAAAAGGTATCC                       |
| 533-SA-R                         |          | GGATACCTTTTTATGACCATGCATCATC<br>ACCTTCTATGCCT                       |
| 533-SD-F                         | pCXS     | AGGCATAGAAGGTGATGAGTCATGGTC<br>ATAAAAAGGTATCCGCTGACCA               |
| 533-SD-R                         |          | TGGTCAGCGGATACCTTTTTATGACCAT<br>GACTCATCACCTTCTATGCCT               |
| <b>Primers for ChIP</b>          |          |                                                                     |
| HAK5-ChIP-P1-F                   |          | TAACCCTCAATAATACGTATTTG                                             |
| HAK5-ChIP-P1-R                   |          | ATTTTGTACCAATTAGCTAATCTT                                            |
| HAK5-ChIP-P2-F                   |          | ACTCACTAATGCACACAATGACA                                             |
| HAK5-ChIP-P2-R                   |          | GGTAACATGACGAGTTGGTGG                                               |
| HAK5-ChIP-P3-F                   |          | TCCGTTATCCACCCTTACCA                                                |
| HAK5-ChIP-P3-R                   |          | TGGGCAAAGTAACTAATGATGG                                              |
| HAK5-qRT-F                       |          | AAGAGGAACCAAATGCTGAGACA                                             |
| HAK5-qRT-R                       |          | GCCCCGATGAAGGGACAT                                                  |
| <b>Primers for EMSA</b>          |          |                                                                     |
| CKS-ARF2-N-BamHI-F               | pTrc-CKS | CGGGATCCATGGCGAGTTCGGAGGTTT<br>C                                    |
| CKS-ARF2-N-EcoRI-R               |          | GGAATTCCTCAGGAGCATCACACTCTAC<br>ACTCTC                              |
| CKS-ARF2-BamHI-F                 | pTrc-CKS | CGGGATCCATGGCGAGTTCGGAGGTTT<br>C                                    |
| CKS-ARF2-NheI-R                  |          | CTAGCTAGCAGAGTTCAGCGCTGGA<br>CA                                     |
| HAK5-P1-F                        |          | TAACCCTCAATAATACGTATTTG                                             |
| HAK5-P1-R                        |          | ATTTTGTACCAATTAGCTAATCTT                                            |
| HAK5-mutant P1-F                 |          | TGACTATTTGCAAGAGACAATAGAATAG<br>ACGATGCAAAAAC                       |
| HAK5-mutant P1-R                 |          | TGACTATTTGCAATTTTTTATAGAATAGA<br>CGATGCAAAAAC                       |
| HAK5-P3-R                        |          | CGATAGGATTGTCTATTTAAGATATCTG                                        |
| HAK5-P3-R                        |          | CGATAGGATTGTCTATTTAAGATATCTG                                        |
| HAK5-mutant P3-1-F               |          | AATTATCCGTTATCCACCCTTACCAATAT<br>TGTTTTTTCAGATATCTTAAATAGACAA<br>TC |

| Primer name                                  | Vector   | Primer sequence (5'–3')                                             |
|----------------------------------------------|----------|---------------------------------------------------------------------|
| <b>Primers for EMSA</b>                      |          |                                                                     |
| HAK5-mutant P3-1-R                           |          | GATTGTCTATTTAAGATATCTGAAAAAA<br>CAATATTGGTAAGGGTGGATAACGGATA<br>ATT |
| HAK5-mutant P3-2-F                           |          | TATTGTTTTTTTCAGATATCTTAAATAAA<br>AAATCCTATCGAATCGAATCCCGCGG         |
| HAK5-mutant P3-2-R                           |          | CCGCGGGAATTCGATTCGATAGGATTTT<br>TTATTTAAGATATCTGAAAAAACAATA         |
| 689-SA-F                                     | pTrc-CKS | GTCCTGAACCTTTGGTGCTGCTATCTGT<br>GTAAGCC                             |
| 689-SA-R                                     |          | GGCTTACACAGATAGCAGCACCAAAGG<br>TTCAGGAC                             |
| 689-SD-F                                     | pTrc-CKS | AGGTCCTGAACCTTTGGGTCTGCTATCT<br>GTGTAAGCCCCGC                       |
| 689-SD-R                                     |          | GCGGGGCTTACACAGATAGCAGACCCA<br>AAGGTCAGGACCT                        |
| <b>Primers for cell free phosphorylation</b> |          |                                                                     |
| 501-700 BamHI-F                              | pTrc-CKS | CGGGATCCTCAGCCAGGCATGAACCTA<br>CTTAC                                |
| 501-700 EcoRI-R                              |          | CGGAATTCTTTTGACTGATCTGAAAGGT<br>CCTGAA                              |
